# Supplementary figures and images for: Earth-like planetary magnetotails as non-linear oscillators
Source: Copernicus journal article supplement (doi:10.5194/angeo-2020-12), 2020-04-20

Planetary Magnetotail Dynamics Model:  
Displacement vs velocity vs mass vs time

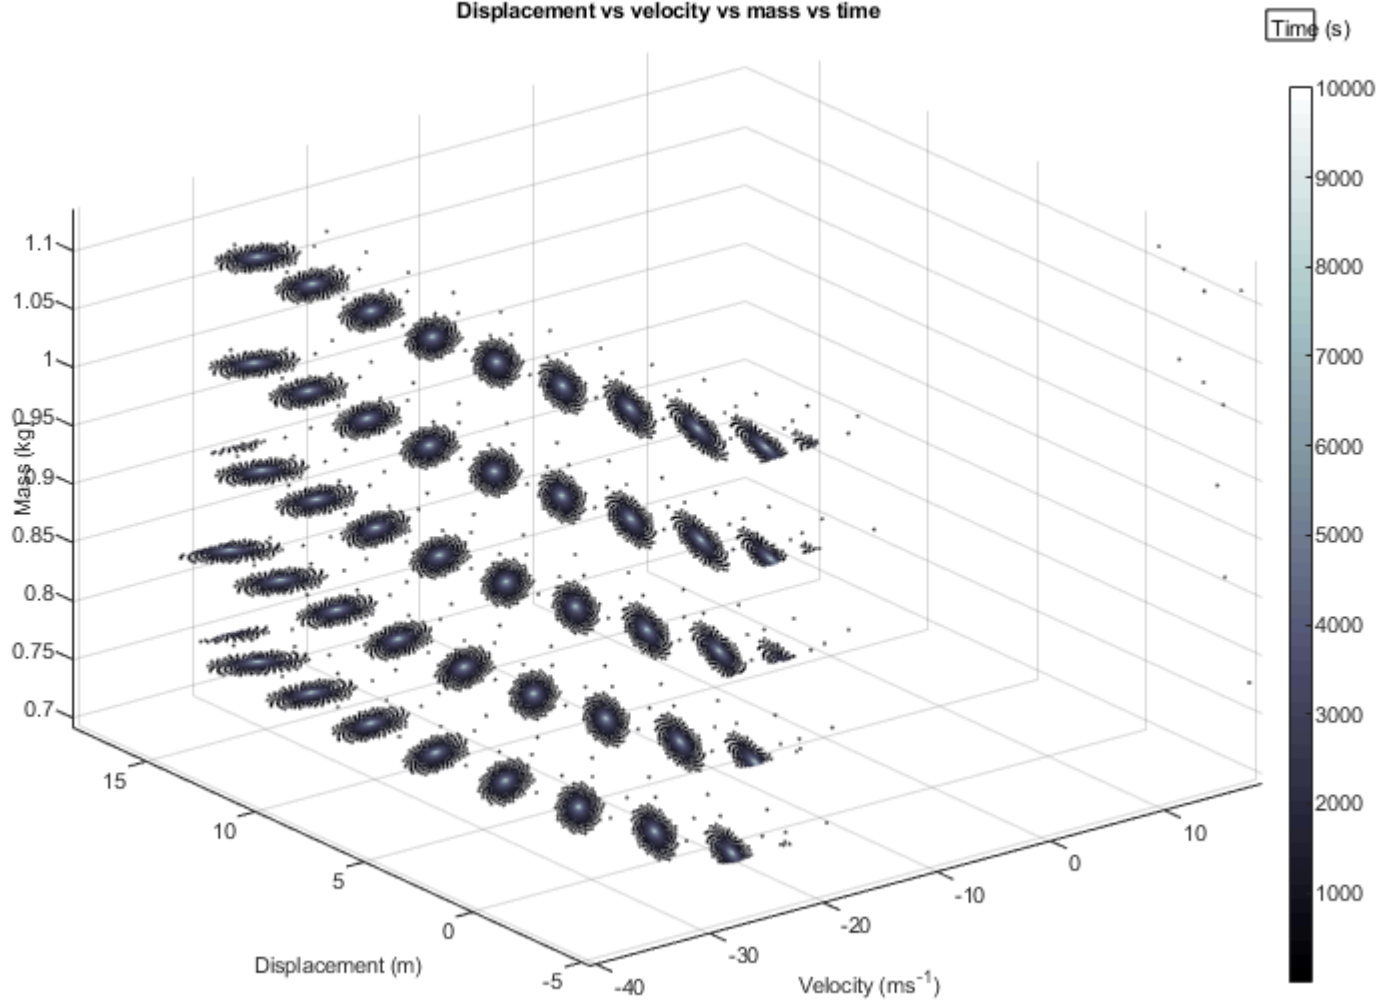

Supplement: Supplementary file 1 [file angeo-2020-12-supplement.pdf]
